# Supplementary material
Source: Springer Nature journal article supplement (https://www.springermedizin.de/resource/supplementary/13063_2013_1488_MOESM3_ESM.pdf/9620140)
Supplement: MOESM3 [file 9620140]

| Number in each group |      | Mean difference in OKS |              |              |              |              |              |
|----------------------|------|------------------------|--------------|--------------|--------------|--------------|--------------|
|                      |      | 2.0                    |              | 3.0          |              | 4.0          |              |
| Power                | SD   | 1% sig level           | 5% sig level | 1% sig level | 5% sig level | 1% sig level | 5% sig level |
| 90                   | 8.0  | 480                    | 340          | 215          | 150          | 120          | 85           |
|                      | 9.0  | 600                    | 430          | 270          | 190          | 150          | 110          |
|                      | 10.0 | 740                    | 520          | 330          | <b>235</b>   | 190          | 130          |
| 80                   | 8.0  | 375                    | <b>250</b>   | 170          | 110          | 100          | 60           |
|                      | 9.0  | 470                    | 320          | 210          | 140          | 120          | 80           |
|                      | 10.0 | 590                    | 390          | 260          | 175          | 150          | 100          |
